# Supplementary material for: Mechanical stabilization of metallic microstructures by insertion of an adhesive polymer underlayer for further optical and electrical applications
Source: Royal Society of Chemistry journal article supplement (doi:10.1039/c6tc00025h), 2016-01-01
Supplement: c6tc00025h1.pdf [file c6tc00025h1.pdf]

# Electronic Supplementary Information

## Mechanical Stabilization of Metallic Microstructures by Insertion of Adhesive Polymer Underlayer for Further Optical and Electrical Application

Tieqiang Wang,<sup>\*a</sup> Guoshuai Song,<sup>a</sup> Fuchun Liu,<sup>b</sup> Yingqiu Qi,<sup>c</sup> Chengsheng Luo,<sup>c</sup>  
Xuemin Zhang,<sup>a</sup> Yunong Li,<sup>a</sup> Enhou Han,<sup>b</sup> Yu Fu<sup>\*a</sup> and Yonghua Jiao<sup>\*c</sup>

a College of Sciences, Northeastern University, Shenyang 110819, P. R. China, E-mail: wangtieqiang@mail.neu.edu.cn, fuyu@mail.neu.edu.cn;

b State Key Laboratory for Corrosion and Protection, Institute of Metal Research, Chinese Academy of Sciences, Shenyang, 110016, P. R. China;

c College of Life and Health Sciences, Northeastern University, Shenyang 110819, P. R. China, E-mail: jiaoyh@mail.neu.edu.cn.

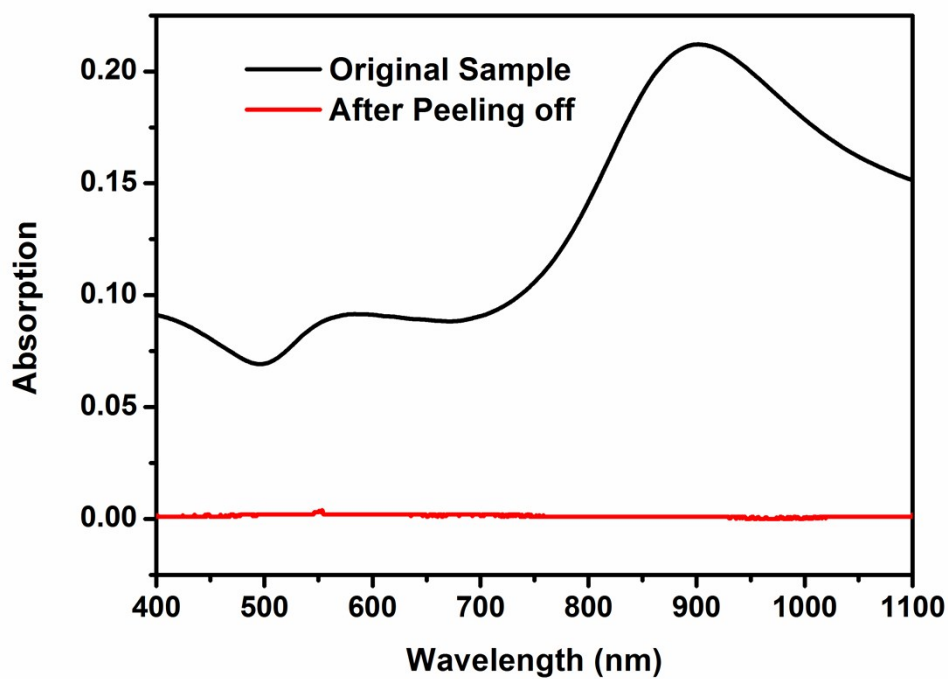

**Fig. S1.** The absorption spectra of the sample before and after the Au TA was peeled off from the substrate.

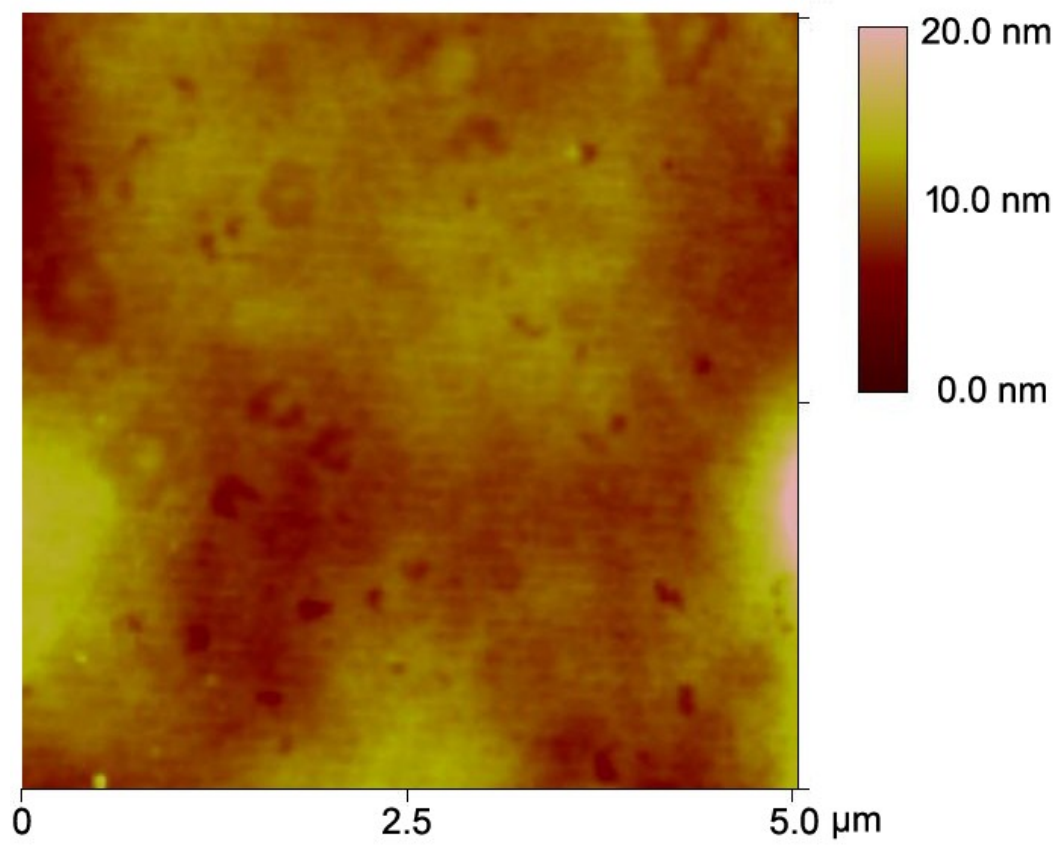

**Fig. S2.** The AFM image of the PEI/PAA couple layer.

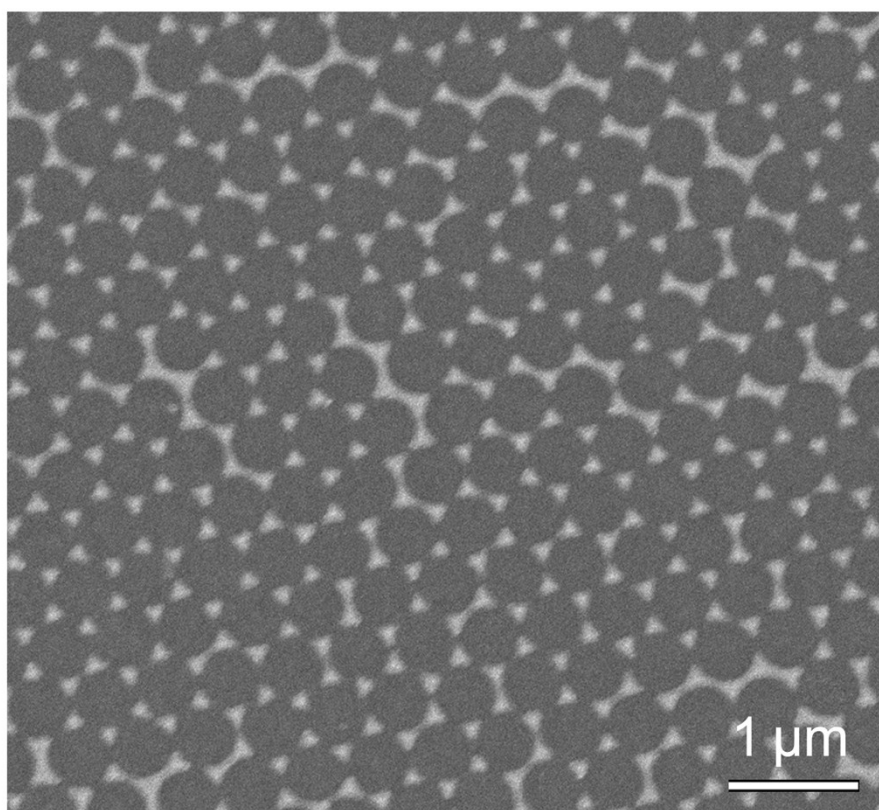

**Fig. S3.** The SEM images of the as-enhanced Au TA by PAT after multi-time test.

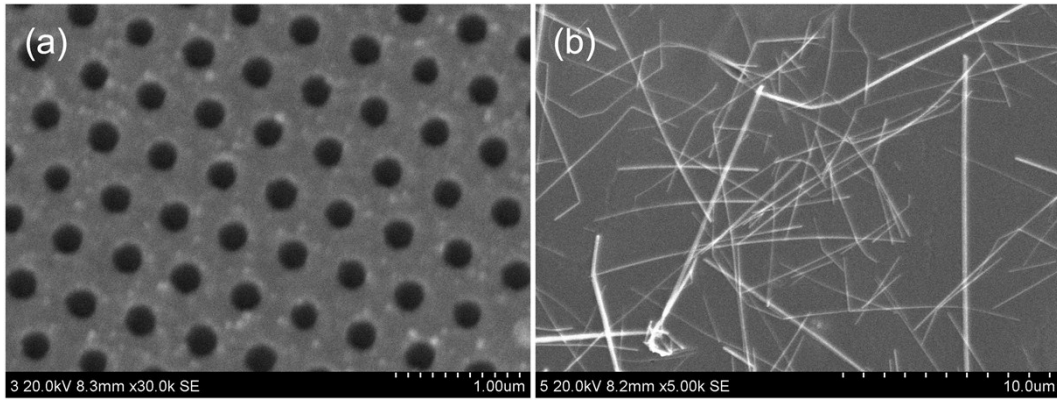

**Fig. S4.** The SEM images of the as-enhanced Ag nanohole array and Ag nanowire network after anti-rubbing test and anti-sonic test.
